# Supplementary material
Source: PubMed Central journal article supplement (PMC3593789)

## **Supplementary Figure Legends**

### **Figure S1. Biochemical signature of E613R and allelic series lymphocytes**

(A) Whole-cell lysates of resting thymocytes from allelic series and E613R mice were blotted with Ab to the inhibitory and activating tyrosines of Lck (Lck Y505/Src Y416). Src416 Ab binds activating tyrosines of all SFKs. The lower band represents p56 Lck; the upper band, p59 Fyn. Total Lck is detected as loading control.

(B) Whole-cell lysates of resting B cells from allelic series and E613R mice were blotted with Ab to the inhibitory and activating tyrosines of Lyn (Lyn Y507/Src Y416). Src416 Ab binds activating tyrosines of all SFKs while Lyn507 is relatively specific. Total Lyn and Erk1/2 are detected as loading controls.

Data are representative of at least three independent experiments.

### **Figure S2. Phenotypic and functional signature of E613R and allelic series B cells**

(A) BCR-stimulated, fixed, and permeabilized lymphocytes were stained for phospho-Erk and costained for CD23 and B220 so that B cells could be identified as described in Figure 2E. Data were collected by flow cytometry. Histograms depict intracellular phospho-Erk in LN B cells from +/+, H/H, and E613R mice. Cells in bottom panel were treated identically after pre-incubation with the Mek1/2 inhibitor U0126 (10nM) for 15 minutes at 37C.

(B) Histograms representing surface expression of various markers on CD45<sup>+/+</sup> (gray shaded histogram) and CD45<sup>-/-</sup>, H/H, or E613R follicular mature splenic B cells (CD23+AA4.1<sup>neg</sup>). Data are representative of at least three independent experiments.

**Figure S3. Distinct effects of Lyn deficiency and supraphysiologic CD45 expression on BCR signaling and B cell activation**

(A) Histograms depict intracellular phospho-Erk in LN B cells from +/+, H/H, and Lyn<sup>-/-</sup> mice treated for 3 minutes with a range of anti-IgM doses, as described in 2D.

(B) Graph represents quantification of data in (A). Values are the mean  $\pm$  SEM of 3 biological replicates.

(C) Graph representing MFI of CD86 expression on LN B cells from CD45<sup>+/+</sup>, H/H, and Lyn<sup>-/-</sup> mice stimulated for 16 hours with varying doses of anti-IgM. Values are mean  $\pm$  SEM of three biological replicates.

**Figure S4. Genetic epistasis between CD45 alleles and Lyn**

(A, B) Representative plots (A) or histograms (B) of splenic B cells from E613R, +/+, and H/H mice genetically sufficient or deficient for Lyn stained to identify (A) B cell developmental stages (T1 = AA4.1<sup>+</sup>CD23<sup>-</sup>; T2 = AA4.1<sup>+</sup>CD23<sup>+</sup>; FO = AA4.1<sup>-</sup>CD23<sup>+</sup>) or (B) surface expression of CD21

Figure S1.

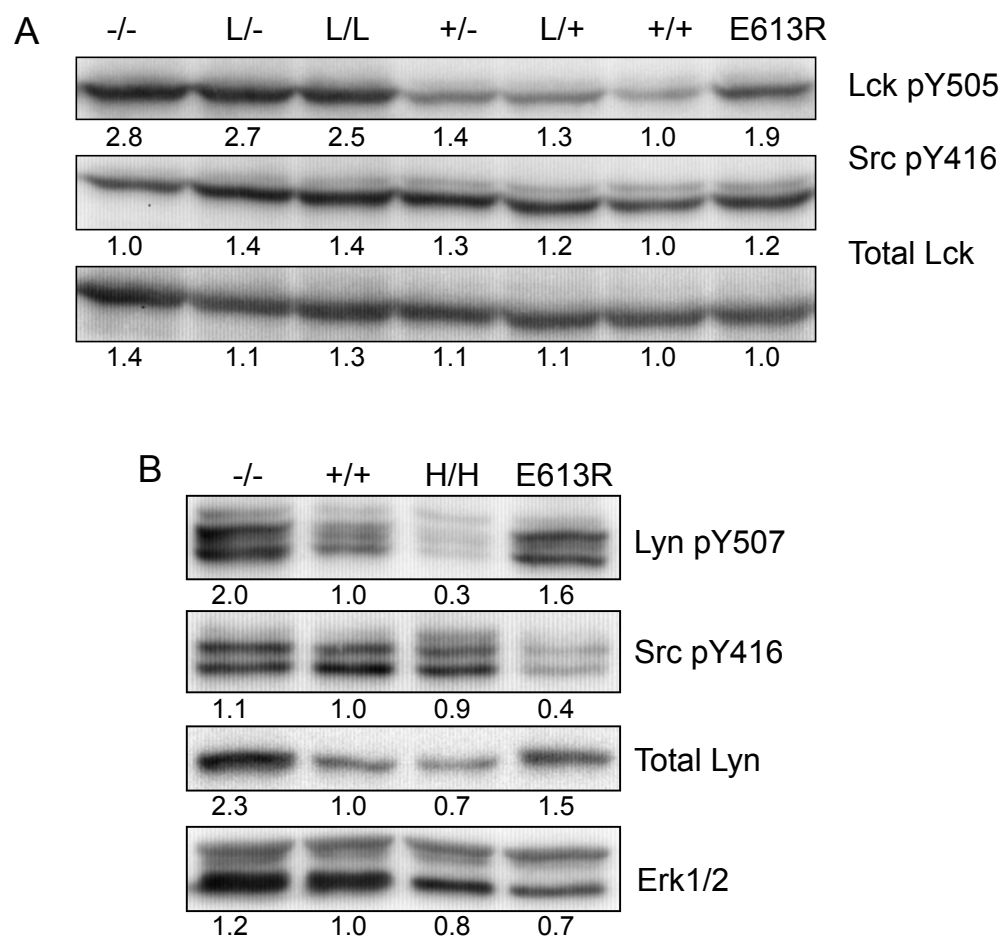

Figure S2.

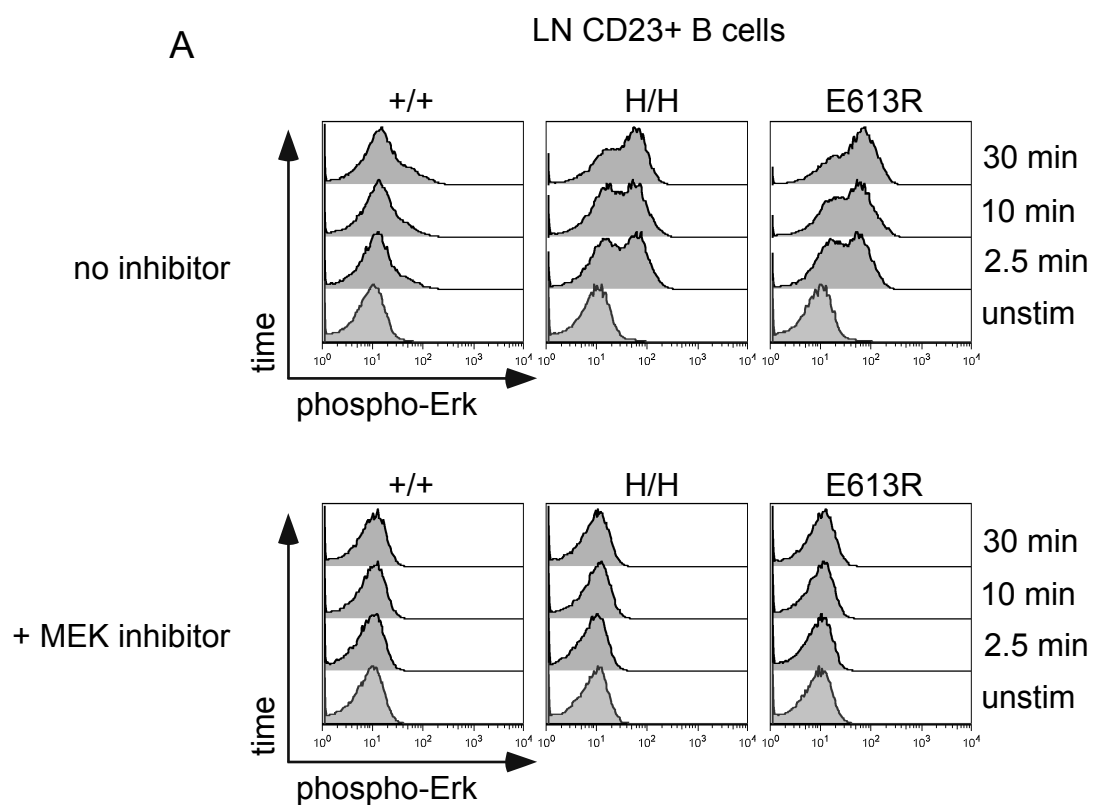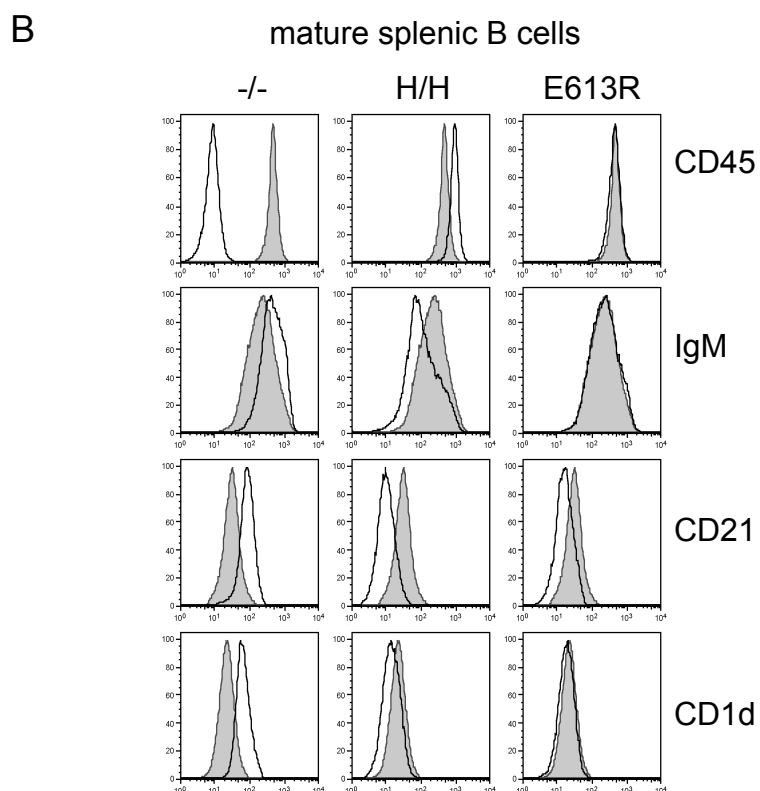

Figure S3.

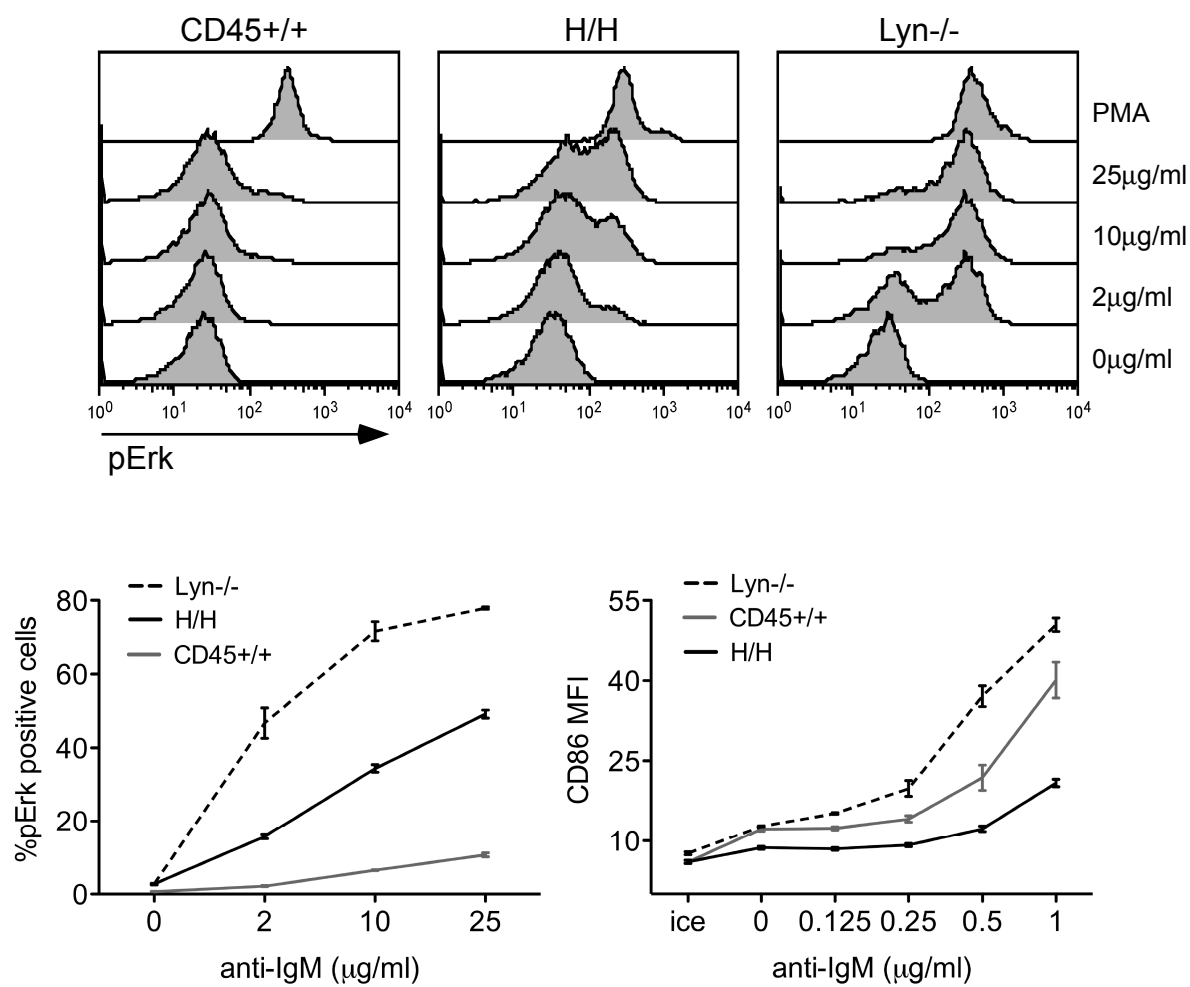

Figure S4.

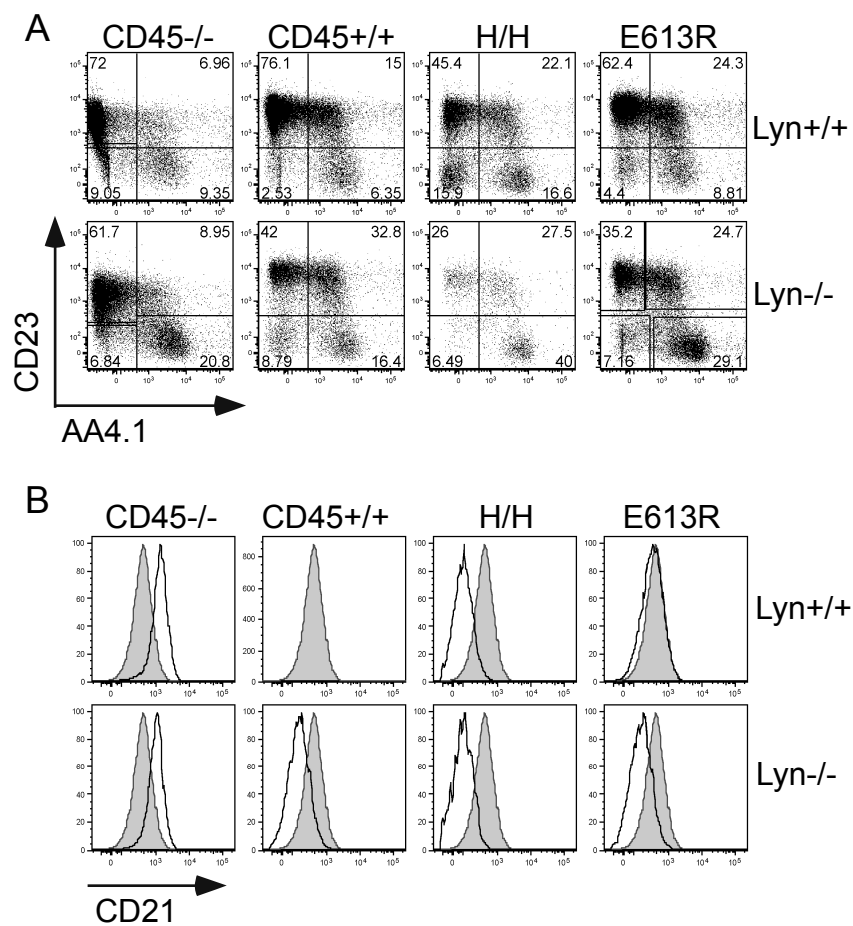

Supplement: NIHMS433538-supplement-1.pdf [file NIHMS433538-supplement-1.pdf]
